# Supplementary material for: Landscape topography structures the soil microbiome in arctic polygonal tundra
Source: PubMed Central journal article supplement (PMC5823929; doi:10.1038/s41467-018-03089-z), 2018-02-22

**Landscape topography structures the soil microbiome in arctic polygonal tundra**

Taş et al. 2018

Supplementary Table and Figures

## Supplementary Tables

Supplementary Table 1. Soil and pore water chemistry for selected depths in deep cores from a flat-centered polygon. Values are averages of duplicate measurements per sample depth.

| Depth (cm) | Horizon    | pH   | N (%) | C (%) | C/N  | Nitrate ( $\mu\text{M}$ ) | Nitrite ( $\mu\text{M}$ ) | Sulfate ( $\mu\text{M}$ ) | Iron ( $\mu\text{M}$ ) | Cl ( $\mu\text{M}$ ) | Na ( $\mu\text{M}$ ) | Mg ( $\mu\text{M}$ ) | Al ( $\mu\text{M}$ ) | K ( $\mu\text{M}$ ) | Ca ( $\mu\text{M}$ ) |
|------------|------------|------|-------|-------|------|---------------------------|---------------------------|---------------------------|------------------------|----------------------|----------------------|----------------------|----------------------|---------------------|----------------------|
| -2 to -7   | organic    | 5.09 | 2.5   | 40.1  | 16.1 | 242.5                     | 98.9                      | 284.7                     | 45.4                   | 3.7E+02              | 2.9E+04              | 3.5E+03              | 5.0E+02              | 6.2E+03             | 8.8E+03              |
| -15        | organic    | 4.93 | 0.6   | 10.4  | 18.5 | 479.4                     | 81.0                      | 579.1                     | 36.2                   | 4.0E+02              | 5.1E+04              | 3.7E+03              | 1.1E+03              | 4.2E+02             | 8.2E+03              |
| -25        | mineral    | 4.54 | 1.2   | 18.7  | 15.8 | 60.4                      | 75.6                      | 302.3                     | 42.4                   | 3.1E+02              | 4.0E+04              | 1.6E+03              | 1.2E+03              | 1.9E+02             | 9.1E+03              |
| -35        | mineral    | 4.94 | 0.8   | 12.9  | 16.8 | 41.8                      | 48.7                      | 12.4                      | 119.3                  | 2.9E+02              | 5.0E+04              | 2.7E+03              | 1.2E+03              | 6.4E+02             | 7.2E+03              |
| -50        | permafrost | 6.19 | 1.5   | 30.2  | 20.7 | 54.8                      | 0.0                       | 1.0                       | 65.8                   | 2.9E+03              | 2.5E+05              | 4.2E+04              | 1.8E+02              | 4.3E+03             | 4.4E+04              |
| -65        | permafrost | 7.32 | 0.4   | 6.4   | 17.1 | 73.2                      | 0.0                       | 104.5                     | 9.4                    | 1.2E+04              | 1.1E+06              | 1.9E+05              | 9.5E+01              | 4.7E+04             | 1.4E+05              |
| -80        | permafrost | 7.43 | 0.9   | 16.3  | 18.4 | 52.5                      | 0.0                       | 26.2                      | 32.7                   | 8.5E+03              | 7.7E+05              | 1.4E+05              | 6.6E+01              | 2.8E+04             | 9.5E+04              |
| -95        | permafrost | 7.06 | 0.6   | 12.5  | 19.8 | 28.5                      | 0.0                       | 87.8                      | 2.0                    | 1.5E+04              | 1.1E+06              | 3.5E+05              | 5.0E+01              | 3.5E+04             | 2.2E+05              |
| -115       | permafrost | 7.69 | 0.5   | 9.3   | 19.9 | 25.0                      | 0.0                       | 26.1                      | 16.4                   | 1.0E+04              | 7.5E+05              | 2.3E+05              | 8.2E+01              | 2.5E+04             | 1.2E+05              |
| -125       | permafrost | 7.00 | 0.4   | 8.2   | 20.0 | 14.5                      | 0.0                       | 27.9                      | 1.8                    | 8.5E+03              | 6.2E+05              | 1.8E+05              | 1.2E+02              | 2.3E+04             | 8.8E+04              |
| -140       | permafrost | 8.18 | 0.1   | 2.2   | 16.9 | 17.5                      | 0.0                       | 1108.0                    | 0.7                    | 3.1E+04              | 6.8E+05              | 7.4E+05              | 7.6E+01              | 1.1E+05             | 2.9E+05              |
| -150       | permafrost | 7.69 | 0.1   | 2.3   | 16.7 | 12.2                      | 22.7                      | 1817.3                    | 0.3                    | 1.6E+04              | 1.2E+06              | 3.2E+05              | 1.3E+02              | 5.3E+04             | 1.3E+05              |
| -165       | permafrost | 8.36 | 0.1   | 1.7   | 15.0 | 8.9                       | 0.0                       | 1717.9                    | 0.5                    | 4.5E+03              | 4.2E+05              | 7.2E+04              | 1.4E+02              | 3.0E+04             | 4.2E+04              |
| -177       | permafrost | 8.48 | 0.2   | 2.5   | 16.0 | 11.4                      | 0.0                       | 4179.7                    | 0.4                    | 1.3E+04              | 1.1E+06              | 2.6E+05              | 1.8E+01              | 6.4E+04             | 1.3E+05              |
| -192       | permafrost | 8.61 | 0.1   | 1.9   | 14.6 | 6.4                       | 0.0                       | 4752.2                    | 0.2                    | 1.2E+04              | 1.1E+06              | 2.3E+05              | 2.1E+01              | 5.4E+04             | 1.1E+05              |
| -207       | permafrost | 8.57 | 0.2   | 2.6   | 15.4 | 0.0                       | 0.0                       | 4855.8                    | 0.5                    | 1.2E+04              | 1.0E+06              | 2.0E+05              | 1.0E+02              | 5.5E+04             | 1.1E+05              |
| -217       | permafrost | 8.61 | 0.1   | 1.8   | 14.3 | 0.0                       | 0.0                       | 4036.9                    | 0.3                    | 7.7E+03              | 7.4E+05              | 1.3E+05              | 5.6E+01              | 5.0E+04             | 6.9E+04              |
| -227       | permafrost | 8.58 | 0.1   | 2.1   | 15.1 | 0.0                       | 0.0                       | 7570.6                    | 0.4                    | 1.7E+04              | 1.4E+06              | 3.0E+05              | 7.9E+01              | 6.5E+04             | 1.6E+05              |
| -237       | permafrost | 8.53 | 0.1   | 2.3   | 15.7 | 6.9                       | 0.0                       | 10126.7                   | 0.3                    | 2.5E+04              | 2.1E+06              | 4.0E+05              | 1.7E+01              | 9.0E+04             | 2.2E+05              |
| -257       | permafrost | 8.70 | 0.1   | 1.8   | 12.5 | 0.0                       | 0.0                       | 20131.7                   | 7.1                    | 4.0E+04              | 4.1E+06              | 7.9E+05              | 9.6E+01              | 1.3E+05             | 3.7E+05              |
| -265       | permafrost | 8.37 | 0.1   | 1.8   | 12.4 | 36.7                      | 0.0                       | 22947.8                   | 1.1                    | 4.6E+04              | 4.6E+06              | 1.0E+06              | 9.0E+01              | 1.6E+05             | 4.5E+05              |

Supplementary Table 2. Active layer samples from different polygon types and futures were used in metagenomics analysis. Samples were sequences with Illumina HiSeq 2000 platform and resulted in variable number of high quality reads.

| <b>Polygon type</b> | <b>Distance (m)</b> | <b>Soil horizon</b> | <b>Number of reads</b> |
|---------------------|---------------------|---------------------|------------------------|
| High Centered       | 47                  | Organic             | 9.5E+07                |
|                     | 47                  | Mineral             | 9.6E+06                |
|                     | 50                  | Organic             | 5.5E+06                |
|                     | 50                  | Mineral             | 1.4E+08                |
|                     | 53                  | Organic             | 1.5E+08                |
|                     | 53                  | Mineral             | 2.9E+08                |
| Flat Centered       | 204                 | Organic             | 2.1E+08                |
|                     | 210                 | Organic             | 2.6E+08                |
|                     | 210                 | Mineral             | 1.2E+08                |
|                     | 214                 | Organic             | 1.1E+07                |
|                     | 214                 | Mineral             | 4.9E+07                |
| Low Centered        | 405                 | Organic             | 4.5E+07                |
|                     | 405                 | Mineral             | 3.1E+08                |
|                     | 408.5               | Organic             | 1.6E+08                |
|                     | 408.5               | Mineral             | 7.0E+05                |
|                     | 411                 | Organic             | 2.8E+08                |
|                     | 411                 | Mineral             | 2.8E+08                |
|                     | 415                 | Organic             | 1.9E+08                |

Supplementary Table 3. 16S rRNA gene based alpha-diversity metrics from active layer samples of different polygon types

| <b>Polygon Type</b> | <b>Soil horizon</b> | <b>Distance (m)</b> | <b>Faith's PD</b> | <b>Chao1</b> | <b>Shannon H'</b> |
|---------------------|---------------------|---------------------|-------------------|--------------|-------------------|
| High Centered       | Organic             | 47                  | 124               | 8392         | 11.4              |
|                     | Mineral             | 47                  | 118               | 8099         | 11.2              |
|                     | Organic             | 48                  | 128               | 8273         | 11.3              |
|                     | Mineral             | 48                  | 126               | 8056         | 11.3              |
|                     | Organic             | 50                  | 123               | 7435         | 11.2              |
|                     | Mineral             | 50                  | 107               | 7273         | 10.8              |
|                     | Organic             | 53                  | 104               | 6691         | 10.9              |
|                     | Organic             | 53                  | 119               | 7583         | 11.1              |
|                     | Mineral             | 53                  | 122               | 7714         | 11.1              |
|                     | Mineral             | 53                  | 99                | 6529         | 10.9              |
|                     | Organic             | 58                  | 130               | 8698         | 11.3              |
|                     | Mineral             | 58                  | 115               | 7678         | 11.1              |
| Flat Centered       | Organic             | 204.5               | 112               | 8221         | 10.8              |
|                     | Mineral             | 204.5               | 96                | 5536         | 10.6              |
|                     | Mineral             | 205                 | 86                | 5920         | 10.1              |
|                     | Organic             | 207                 | 130               | 9415         | 11.4              |
|                     | Mineral             | 207                 | 85                | 6081         | 10.1              |
|                     | Organic             | 210                 | 84                | 5677         | 9.9               |
|                     | Mineral             | 210                 | 107               | 6855         | 11.0              |
|                     | Organic             | 214                 | 126               | 8526         | 11.4              |
|                     | Mineral             | 214                 | 98                | 7425         | 10.3              |
| Low Centered        | Organic             | 405                 | 103               | 6546         | 10.9              |
|                     | Mineral             | 405                 | 91                | 4801         | 10.3              |
|                     | Organic             | 406                 | 104               | 7204         | 10.8              |
|                     | Mineral             | 406                 | 72                | 4477         | 9.8               |
|                     | Organic             | 408.5               | 100               | 4935         | 9.9               |
|                     | Mineral             | 408.5               | 65                | 3807         | 9.6               |
|                     | Organic             | 411                 | 95                | 5517         | 10.5              |
|                     | Mineral             | 411                 | 75                | 4401         | 9.9               |
|                     | Mineral             | 411                 | 88                | 5203         | 10.4              |
|                     | Organic             | 416                 | 97                | 5090         | 10.6              |



## Supplementary Table 5. Bin identification, completeness and contamination via CheckM

analysis

| Bin Id     | Polygon | Soil Horizon | Marker lineage        | Genome Size (bp) | % abundance in metagenome | GC content (%) |    |     |    |    | Completeness (%) | Contamination (%) | Strain heterogeneity |
|------------|---------|--------------|-----------------------|------------------|---------------------------|----------------|----|-----|----|----|------------------|-------------------|----------------------|
|            |         |              |                       |                  |                           |                | 0  | 1   | 2  | 3+ |                  |                   |                      |
| 53.003.002 | HC      | Organic      | k_Bacteria            | 4.5E+06          | 1.22                      | 59             | 6  | 177 | 8  | 0  | 95.6             | 4.8               | 0.0                  |
| 53.005     | HC      | Organic      | p_Bacteroidetes       | 5.4E+06          | 1.21                      | 40             | 17 | 285 | 14 | 1  | 97.3             | 2.2               | 20.0                 |
| 53-4.002   | HC      | Mineral      | k_Bacteria            | 4.1E+06          | 2.69                      | 68             | 6  | 154 | 3  | 0  | 95.9             | 2.7               | 66.7                 |
| 53-4.004   | HC      | Mineral      | c_Alphaproteobacteria | 4.6E+06          | 2.14                      | 66             | 5  | 325 | 17 | 2  | 98.3             | 2.7               | 13.0                 |
| 53-4.005   | HC      | Mineral      | p_Bacteroidetes       | 4.0E+06          | 1.12                      | 36             | 4  | 304 | 9  | 0  | 98.1             | 3.3               | 11.1                 |
| 53-4.010   | HC      | Mineral      | o_Actinomycetales     | 3.3E+06          | 0.79                      | 66             | 10 | 287 | 17 | 1  | 96.9             | 4.3               | 15.0                 |
| 53-4.014   | HC      | Mineral      | p_Bacteroidetes       | 4.6E+06          | 0.65                      | 41             | 2  | 292 | 10 | 0  | 99.0             | 1.9               | 0.0                  |
| 53-4.027   | HC      | Mineral      | p_Bacteroidetes       | 4.5E+06          | 0.46                      | 36             | 1  | 291 | 24 | 1  | 99.5             | 7.5               | 11.1                 |

  

| Bin Id    | Polygon | Soil Horizon | Marker lineage    | Genome Size (bp) | % abundance in metagenome | GC content (%) |    |     |    |    | Completeness (%) | Contamination (%) | Strain heterogeneity |
|-----------|---------|--------------|-------------------|------------------|---------------------------|----------------|----|-----|----|----|------------------|-------------------|----------------------|
|           |         |              |                   |                  |                           |                | 0  | 1   | 2  | 3+ |                  |                   |                      |
| 204.018   | FC      | Organic      | k_Bacteria        | 4.4E+06          | 0.80                      | 39             | 8  | 78  | 16 | 2  | 89.0             | 10.1              | 68.2                 |
| 210.008   | FC      | Organic      | p_Actinobacteria  | 3.4E+06          | 1.35                      | 69             | 17 | 182 | 7  | 0  | 91.6             | 3.1               | 0.0                  |
| 210.014   | FC      | Organic      | k_Bacteria        | 3.4E+06          | 0.79                      | 68             | 8  | 167 | 14 | 2  | 94.4             | 7.2               | 10.0                 |
| 210.017   | FC      | Organic      | k_Bacteria        | 6.0E+06          | 1.12                      | 62             | 3  | 158 | 24 | 6  | 97.5             | 8.6               | 4.8                  |
| 210.021   | FC      | Organic      | k_Bacteria        | 3.9E+06          | 0.60                      | 57             | 4  | 212 | 10 | 5  | 97.7             | 13.8              | 11.4                 |
| 210.022   | FC      | Organic      | k_Bacteria        | 2.1E+06          | 0.35                      | 60             | 2  | 73  | 26 | 3  | 98.1             | 13.7              | 57.9                 |
| 214-4.002 | FC      | Mineral      | o_Actinomycetales | 5.6E+06          | 5.96                      | 66             | 13 | 275 | 20 | 2  | 94.9             | 7.5               | 22.2                 |
| 214-4.005 | FC      | Mineral      | k_Bacteria        | 2.2E+06          | 1.03                      | 60             | 4  | 161 | 6  | 0  | 97.0             | 1.1               | 33.3                 |

| Bin Id  | Polygon | Soil Horizon | Marker lineage        | Genome Size (bp) | % abundance in metagenome | GC content (%) |     |     |    |    | Completeness (%) | Contamination (%) | Strain heterogeneity |
|---------|---------|--------------|-----------------------|------------------|---------------------------|----------------|-----|-----|----|----|------------------|-------------------|----------------------|
|         |         |              |                       |                  |                           |                | 0   | 1   | 2  | 3+ |                  |                   |                      |
| C-5.032 | LC      | Mineral      | p_Bacteroidetes       | 3.8E+06          | 0.50                      | 36             | 14  | 258 | 31 | 1  | 94.2             | 12.4              | 14.7                 |
| D.003   | LC      | Organic      | c_Alphaproteobacteria | 4.3E+06          | 1.52                      | 65             | 24  | 315 | 7  | 3  | 93.7             | 3.1               | 25.0                 |
| D.006   | LC      | Organic      | k_Bacteria            | 7.6E+06          | 1.95                      | 45             | 3   | 65  | 15 | 21 | 96.6             | 15.0              | 86.9                 |
| D.018   | LC      | Organic      | p_Bacteroidetes       | 5.1E+06          | 0.46                      | 41             | 8   | 294 | 12 | 3  | 97.2             | 5.7               | 0.0                  |
| D.019   | LC      | Organic      | f_Xanthomonadaceae    | 3.5E+06          | 0.33                      | 58             | 23  | 608 | 28 | 1  | 95.2             | 3.5               | 9.7                  |
| D.030   | LC      | Organic      | p_Bacteroidetes       | 3.9E+06          | 0.25                      | 52             | 16  | 276 | 12 | 0  | 93.8             | 4.5               | 16.7                 |
| D-3.007 | LC      | Mineral      | k_Bacteria            | 3.1E+06          | 1.86                      | 62             | 12  | 142 | 12 | 5  | 90.6             | 8.3               | 18.5                 |
| D-3.010 | LC      | Mineral      | k_Bacteria            | 4.6E+06          | 1.57                      | 61             | 6   | 177 | 6  | 2  | 95.6             | 6.8               | 8.3                  |
| D-3.013 | LC      | Mineral      | k_Bacteria            | 4.1E+06          | 0.87                      | 48             | 0   | 145 | 3  | 0  | 100.0            | 2.2               | 66.7                 |
| D-3.020 | LC      | Mineral      | c_Alphaproteobacteria | 2.7E+06          | 0.64                      | 60             | 24  | 313 | 12 | 0  | 90.7             | 3.2               | 33.3                 |
| D-3.025 | LC      | Mineral      | c_Deltaproteobacteria | 6.4E+06          | 0.94                      | 64             | 34  | 208 | 5  | 1  | 90.0             | 4.0               | 12.5                 |
| D-3.026 | LC      | Mineral      | p_Actinobacteria      | 2.5E+06          | 0.67                      | 69             | 16  | 172 | 17 | 1  | 89.3             | 7.4               | 0.0                  |
| D-3.034 | LC      | Mineral      | o_Actinomycetales     | 3.6E+06          | 0.55                      | 62             | 23  | 290 | 2  | 0  | 94.1             | 1.1               | 0.0                  |
| D-3.042 | LC      | Mineral      | k_Bacteria            | 2.8E+06          | 0.34                      | 57             | 9   | 180 | 2  | 0  | 96.3             | 1.7               | 0.0                  |
| D-3.052 | LC      | Mineral      | p_Bacteroidetes       | 5.0E+06          | 0.39                      | 38             | 29  | 279 | 8  | 1  | 93.5             | 3.6               | 18.2                 |
| D-3.054 | LC      | Mineral      | c_Alphaproteobacteria | 2.6E+06          | 0.25                      | 54             | 30  | 309 | 10 | 0  | 94.3             | 2.7               | 10.0                 |
| E.030   | LC      | Organic      | k_Bacteria            | 3.4E+06          | 0.45                      | 68             | 18  | 153 | 19 | 1  | 91.3             | 12.9              | 4.6                  |
| E.001   | LC      | Organic      | p_Euryarchaeota       | 1.3E+06          | 0.92                      | 52             | 135 | 71  | 20 | 3  | 41.1             | 9.1               | 10.3                 |

Supplementary Table 6. 16S rRNA genes identified in genomic bins

| Bin Id     | Polygon | 16S rRNA gene (bp) | Organism                                    | Max score | Total score | Query coverage | E value | Identity |
|------------|---------|--------------------|---------------------------------------------|-----------|-------------|----------------|---------|----------|
| 53.003.002 | HC      | NA                 |                                             |           |             |                |         |          |
| 53.005     | HC      | 1418               | Arcticibacter svalbardensis strain MN12-7   | 1386      | 1386        | 99%            | 0       | 85%      |
| 53-4.002   | HC      | NA                 |                                             |           |             |                |         |          |
| 53-4.004   | HC      | 1452               | Methylocella silvestris strain BL2          | 1908      | 1908        | 91%            | 0       | 93%      |
| 53-4.005   | HC      | 1051               | Solitalea canadensis strain DSM 3403        | 1208      | 1208        | 92%            | 0       | 89%      |
| 53-4.010   | HC      | NA                 |                                             |           |             |                |         |          |
| 53-4.014   | HC      | NA                 |                                             |           |             |                |         |          |
| 53-4.027   | HC      | NA                 |                                             |           |             |                |         |          |
| 204.018    | FC      | NA                 |                                             |           |             |                |         |          |
| 210.008    | FC      | 1498               | Conexibacter woesei strain DSM 14684        | 2342      | 2342        | 100%           | 0       | 95%      |
| 210.014    | FC      | 1438               | Geobacter metallireducens strain GS-15      | 1339      | 1339        | 99%            | 0       | 84%      |
| 210.017    | FC      | 1176               | Thermoanaerobaculum aquaticum strain MP-01  | 1373      | 1373        | 100%           | 0       | 88%      |
| 210.021    | FC      | NA                 |                                             |           |             |                |         |          |
| 210.022    | FC      | NA                 |                                             |           |             |                |         |          |
| 214-4.002  | FC      | 1249               | Frankia alni ACN14a strain ACN14A           | 1847      | 1847        | 99%            | 0       | 93%      |
| 214-4.005  | FC      | 1525               | Aciditerrimonas ferrireducens strain IC-180 | 1875      | 1875        | 96%            | 0       | 90%      |
| C-5.032    | LC      | 1107               | Chitinophaga niabensis strain JS13-10       | 1546      | 1546        | 95%            | 0       | 93%      |
| D.003      | LC      | 1445               | Devosia geojensis strain BD-c194            | 1982      | 1982        | 100%           | 0       | 91%      |
| D.006      | LC      | NA                 |                                             |           |             |                |         |          |
| D.018      | LC      | NA                 |                                             |           |             |                |         |          |
| D.019      | LC      | 1539               | Rhodanobacter umsongensis strain GR24-2     | 2403      | 2403        | 87%            | 0       | 99%      |
| D.030      | LC      | 1484               | Chitinophaga eiseniae strain YC6729         | 1882      | 1882        | 100%           | 0       | 90%      |
| D-3.007    | LC      | NA                 |                                             |           |             |                |         |          |
| D-3.010    | LC      | 1558               | Haliangium ochraceum DSM 14365              | 1784      | 3569        | 100%           | 0       | 87%      |
| D-3.013    | LC      | 1584               | Geobacter metallireducens strain GS-15      | 1280      | 1280        | 97%            | 0       | 82%      |
| D-3.020    | LC      | NA                 |                                             |           |             |                |         |          |
| D-3.025    | LC      | NA                 |                                             |           |             |                |         |          |
| D-3.026    | LC      | NA                 |                                             |           |             |                |         |          |
| D-3.034    | LC      | NA                 |                                             |           |             |                |         |          |
| D-3.042    | LC      | 1488               | Acidipila rosea strain AP8                  | 1903      | 1903        | 94%            | 0       | 91%      |
| D-3.052    | LC      | NA                 |                                             |           |             |                |         |          |
| D-3.054    | LC      | NA                 |                                             |           |             |                |         |          |
| E.030      | LC      | 974                | Pelobacter carbinolicus strain DSM 2380     | 913       | 913         | 99%            | 0       | 84%      |
| E.001      | LC      | 1441               | Methanolinea tarda strain NOBI-1            | 1591      | 1591        | 99%            | 0       | 87%      |



Supplementary Table 7. Identification of bin phylogeny based on *dnaG*, *frr*, *infC*, *nusA*, *pyrG*, *pgk*, *rpl*, *rpm*, *rpo*, *rps*, *tsf* and *smpB* gene identification with Amphora2

| Bin Id     | Polygon | Soil Horizon | Phylum             |
|------------|---------|--------------|--------------------|
| 53.003.002 | HC      | Organic      | Acidobacteria      |
| 53-4.002   | HC      | Mineral      | Bacteria (kingdom) |
| 204.018    | FC      | Organic      | Bacteroidetes      |
| 210.014    | FC      | Organic      | Acidobacteria      |
| 210.017    | FC      | Organic      | Acidobacteria      |
| 210.021    | FC      | Organic      | Verrucomicrobia    |
| 210.022    | FC      | Organic      | Actinobacteria     |
| D.006      | LC      | Organic      | Bacteroidetes      |
| D-3.007    | LC      | Mineral      | Actinobacteria     |
| D-3.010    | LC      | Mineral      | Acidobacteria      |
| D-3.013    | LC      | Mineral      | Bacteria (kingdom) |
| E.030      | LC      | Organic      | Bacteria (kingdom) |

Supplementary Table 8. Gravimetric soil moisture as reported by Hubbard *et al* 2013

| <b>Polygon type</b> | <b>Distance (m)</b> | <b>Soil horizon</b> | <b>Gravimetric Soil<br/>Moisture (g gr soil-1)</b> |
|---------------------|---------------------|---------------------|----------------------------------------------------|
| High Centered       | 47                  | Organic             | 0.74                                               |
|                     | 47                  | Mineral             | 0.58                                               |
|                     | 48                  | Organic             | 0.72                                               |
|                     | 48                  | Mineral             | 0.66                                               |
|                     | 50                  | Organic             | 0.91                                               |
|                     | 50                  | Mineral             | 0.60                                               |
|                     | 52                  | Organic             | 0.66                                               |
|                     | 52                  | Mineral             | 0.61                                               |
|                     | 53                  | Organic             | 0.64                                               |
|                     | 53                  | Mineral             | 0.58                                               |
|                     | 54                  | Organic             | 0.61                                               |
|                     | 54                  | Mineral             | 0.58                                               |
|                     | 58                  | Organic             | 0.67                                               |
|                     | 58                  | Mineral             | 0.50                                               |
| Flat Centered       | 204.5               | Organic             | 0.86                                               |
|                     | 204.5               | Mineral             | 0.51                                               |
|                     | 207                 | Organic             | 0.73                                               |
|                     | 207                 | Mineral             | 0.51                                               |
|                     | 210                 | Organic             | 0.7                                                |
|                     | 210                 | Mineral             | 0.24                                               |
|                     | 214                 | Organic             | 0.75                                               |
|                     | 214                 | Mineral             | 0.37                                               |
| Low Centered        | 405                 | Organic             | 0.79                                               |
|                     | 405                 | Mineral             | 0.44                                               |
|                     | 406                 | Organic             | 0.82                                               |
|                     | 406                 | Mineral             | 0.49                                               |
|                     | 408.5               | Organic             | 0.85                                               |
|                     | 408.5               | Mineral             | 0.55                                               |
|                     | 411                 | Organic             | 0.91                                               |
|                     | 411                 | Mineral             | 0.54                                               |
|                     | 415                 | Organic             | 0.89                                               |

## Supplementary Figures

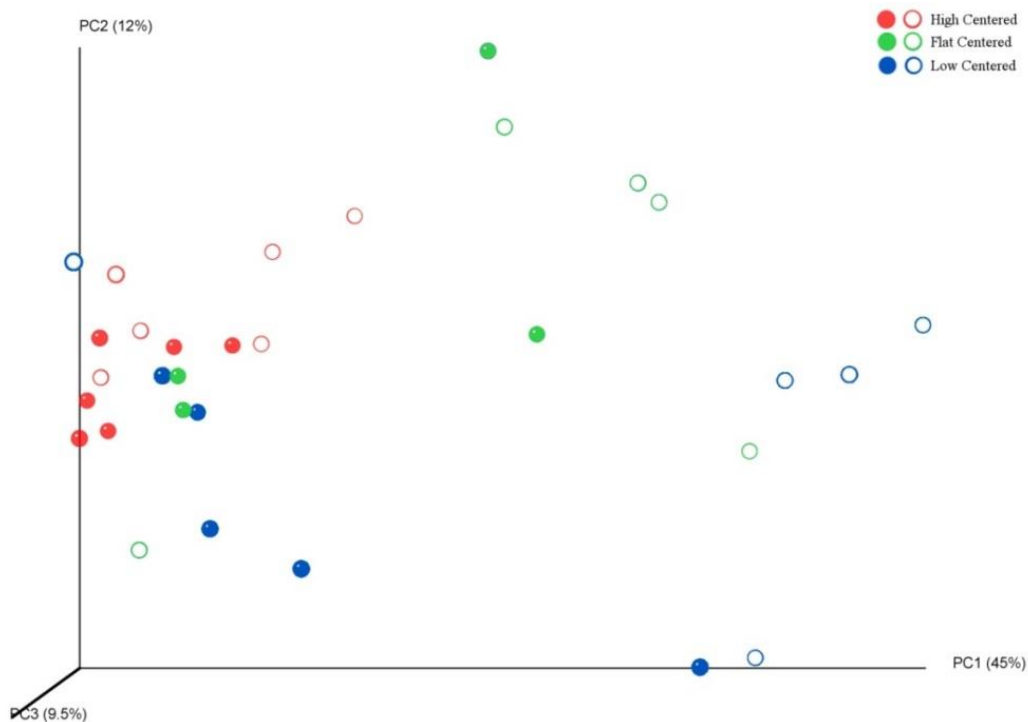

Supplementary Figure 1. Unifrac analysis of 16S rRNA sequence variation within and between polygons. Organic (closed) and mineral (open) soil depths were represented as circles. The variance explained by each principal component (PC) axis is given in parentheses. Effects of main factors on prokaryotic beta-diversity similarity were assessed by analysis of similarity (ANOSIM). Main factors represent polygon type (HC, FC and LC; ANOSIM  $R=0.432$ ,  $p<0.001$ ) and soil horizon (organic and mineral; (ANOSIM  $R=0.117$ ,  $p=0.044$ ). Additionally, Adonis analysis resulted in significant correlations between organic carbon content ( $F=2.02$ ,  $r^2=0.057$ ,  $p=0.032$ ) and total nitrogen ( $F=2.33$ ,  $r^2=0.065$ ,  $p=0.019$ ) of the samples and observed clustering.

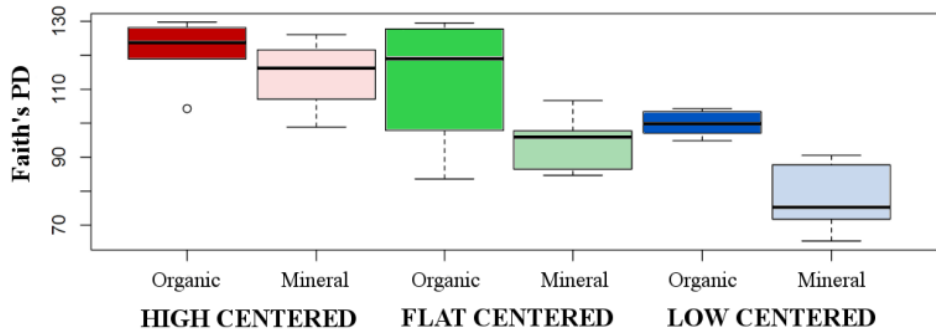

Supplementary Figure 2. Phylogenetic alpha diversity (Faith's PD) were significantly different amongst different polygons ( $F=18.64$ ,  $p<0.001$ ) and soil horizons ( $F=14.34$ ,  $p<0.001$ ). Between different polygon types and soil horizons Faith's PD was higher in high centered polygons. Within each polygon no significant differences were observed between Faith's PD of soil horizons ( $F=1.34$ ,  $p=0.279$ ). Error bars represent the standard error.

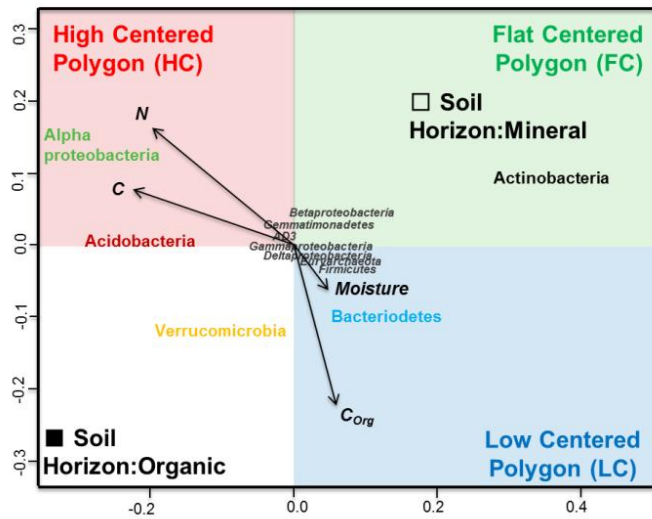

|              | Df | ChiSquare | F     | p     |
|--------------|----|-----------|-------|-------|
| Total C      | 1  | 0.035     | 3.489 | 0.003 |
| Polygon Type | 2  | 0.060     | 2.998 | 0.003 |
| Organic C    | 1  | 0.027     | 2.756 | 0.020 |
| Soil Horizon | 1  | 0.024     | 2.465 | 0.031 |
| pH           | 1  | 0.023     | 2.284 | 0.039 |
| Total N      | 1  | 0.014     | 1.386 | 0.209 |
| Moisture     | 1  | 0.013     | 1.330 | 0.216 |
| Residual     | 21 | 0.209     |       |       |

Supplementary Figure 3. Canonical component analysis explained 55% of the observed variation ( $p=0.005$ ) in microbial community abundances of different polygons.

**A) Methanogenic Archaea**

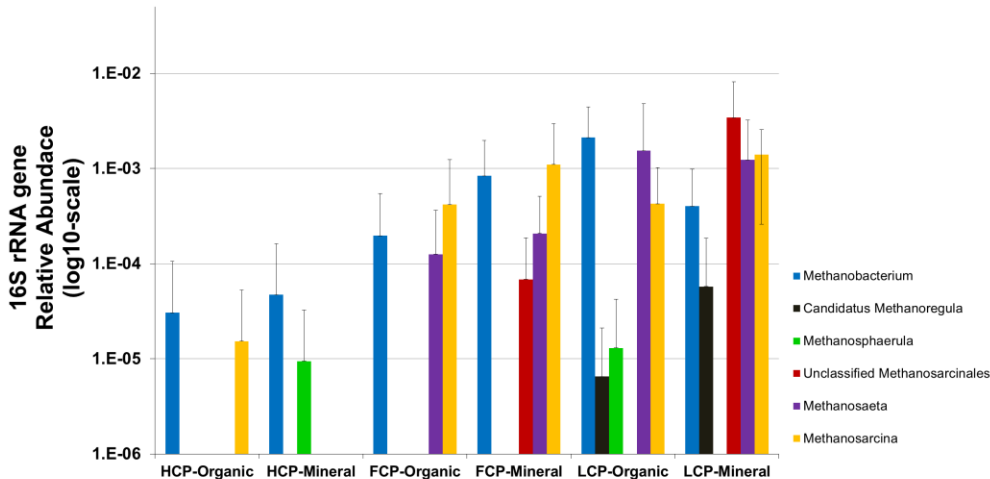

**B) Methylophilic Bacteria**

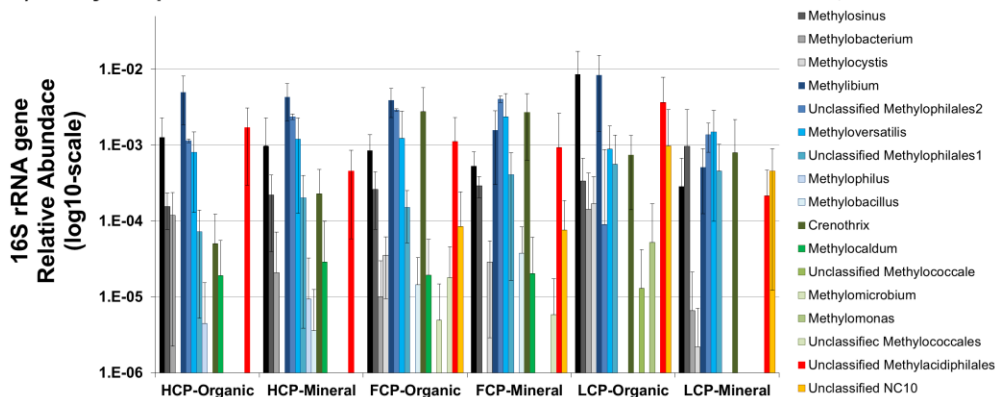

**C) Nitrifying Archaea and Bacteria**

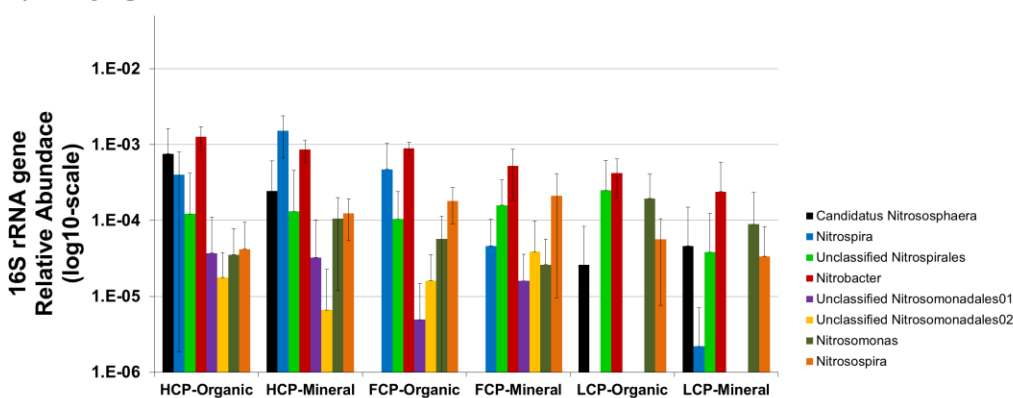

Supplementary Figure 4. 16S rRNA sequence based distribution of A) methanogenic Archaea B) methane oxidizing Bacteria and C) nitrifying Bacteria and Archaea at genus level classification in Barrow polygons. Error bars represent the standard error.

A

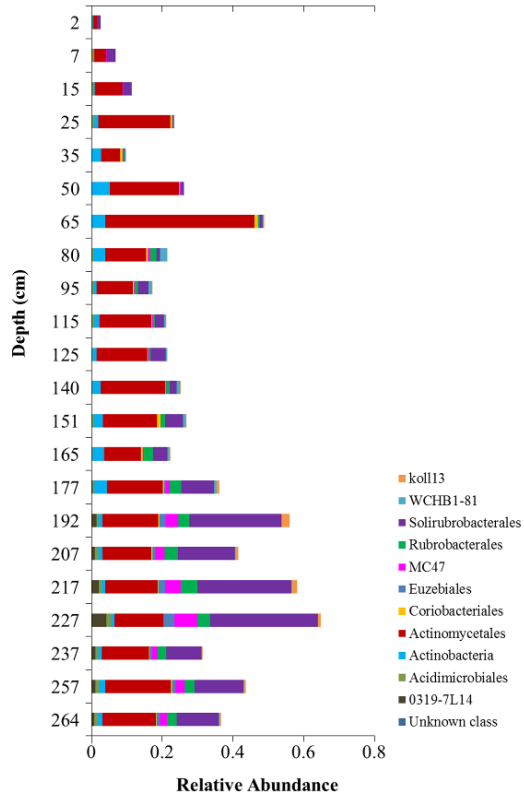

B

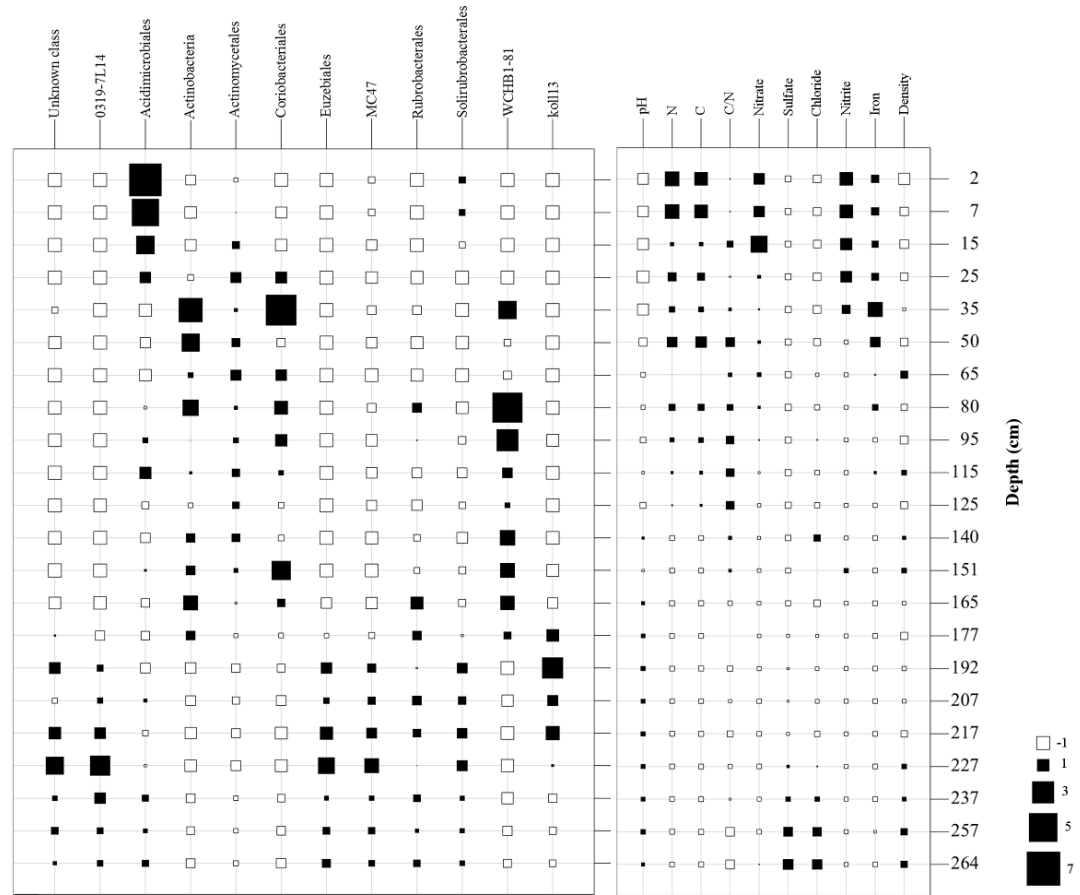

Supplementary Figure 5. A) Order level distribution of Actinobacterial populations along the depth gradient from the deep cores of a flat-centered polygon. Actinomycetales and Solirubrobacterales were the most abundant orders. B) Canonical correlations amongst relative abundances of Actinobacterial orders and sample chemistry at different depths. Size of squares corresponds to the strength of positive (black) or negative (white) correlations. Most Actinobacterial orders except Acidimicrobiales and Solirubrobacterales were negatively correlated with high C, N, iron, nitrate and nitrate content in the organic active layer soils. Actinomycetales and Coribacterales was positively correlated with high iron levels in mineral soils. In permafrost, strongest positive correlations amongst Actinobacterial orders and all sample chemistry was with pH.

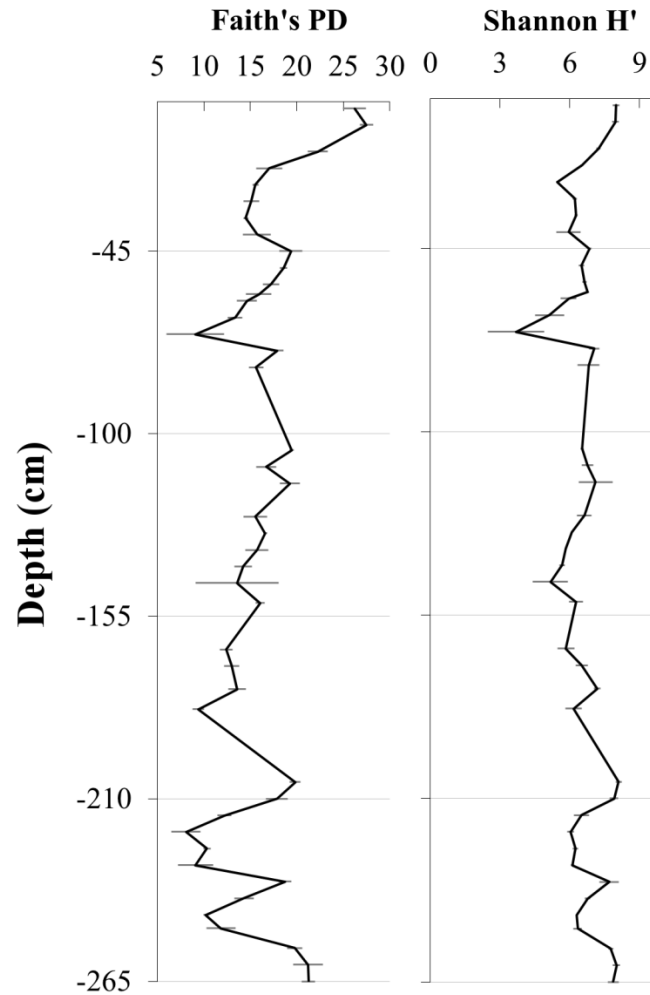

Supplementary Figure 6. Phylogenetic alpha diversity (Faith's PD and Shannon H') changed drastically along the depth profile. Error bars represent the standard deviation observed between duplicate cores and sub-samples in each depth (per depth  $n=8$  between 0 to 1 m,  $n=4$  between 1 to 2.65m).



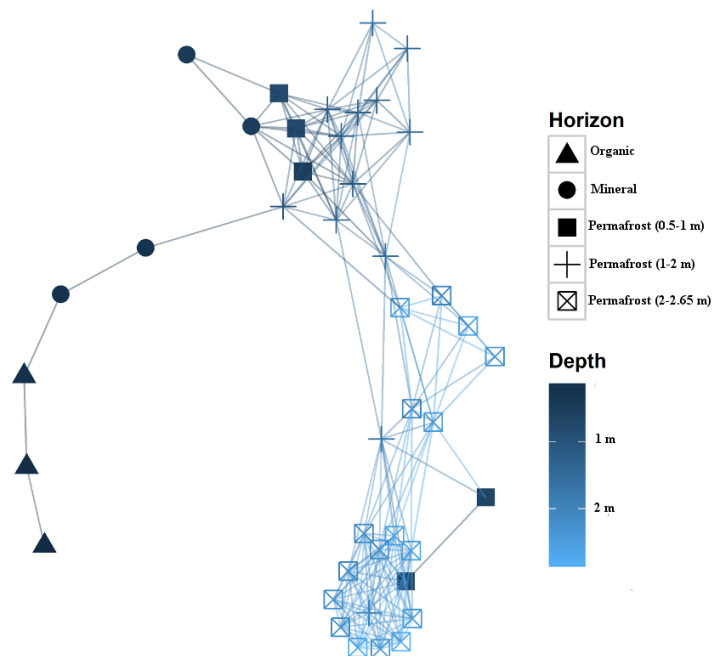

Supplementary Figure 7. Network diagram of deep core samples (nodes) that are linked if they are within the specified Bray distance. Symbols correspond to different soil horizons at different depths. Colors correspond to shallow (dark blue) to deep (light blue) sampling depths. The Bray distance is determined by pooling the OTUs from the replicates of each depth interval (n=8 between 0 to 1 m, n=4 between 1 to 2.65m) and representing their relatedness as the ratio of shared to total OTUs. Clustering patterns broadly corresponded to the changes in depth intervals. Interestingly there were no clusters amongst organic and mineral horizons of the active layer samples. Permafrost samples showed stronger clustering patterns with increasing depth.

## Annotated genes per FOAM module

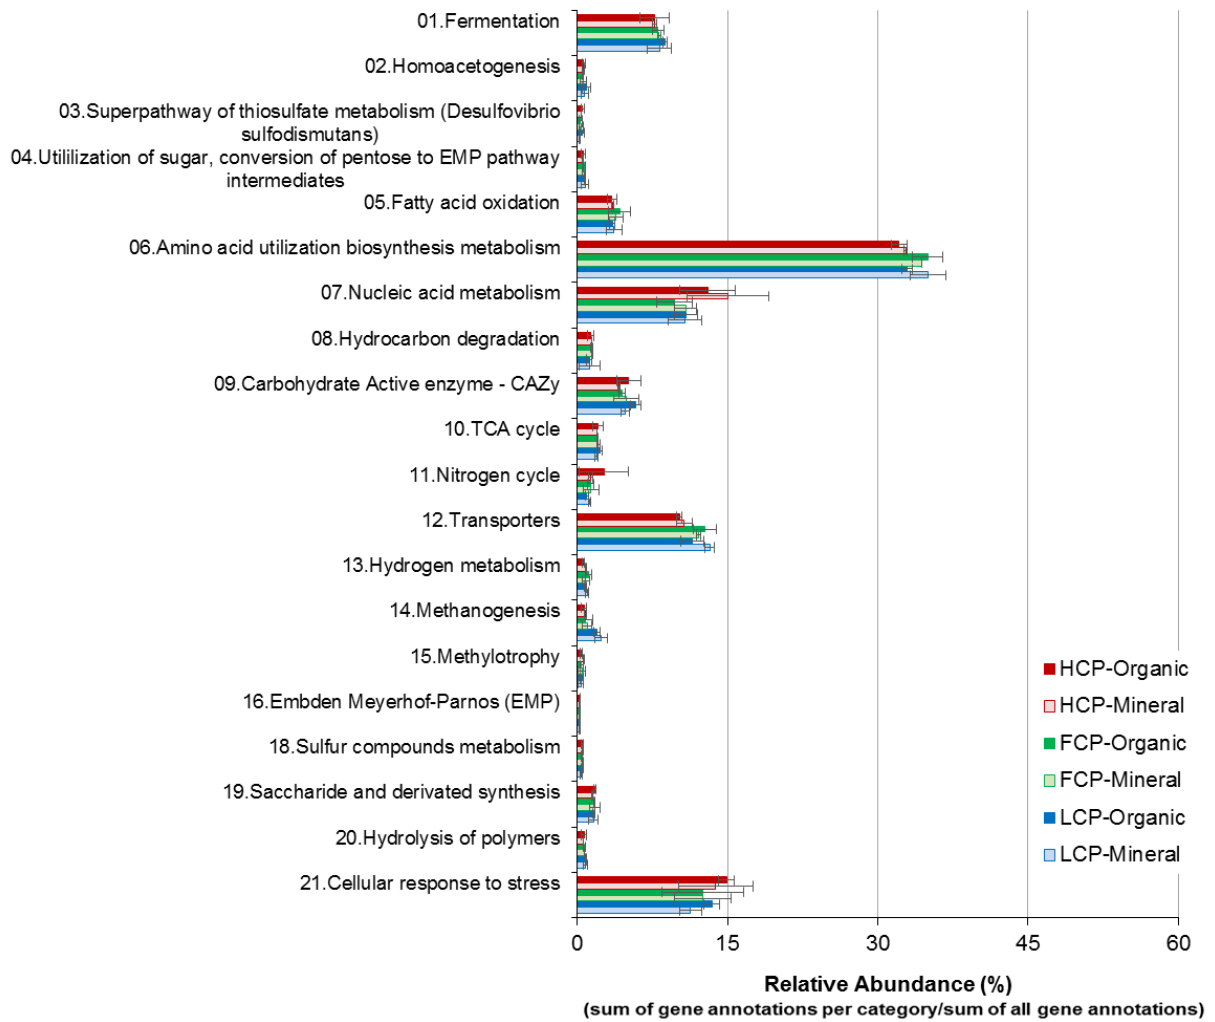

Supplementary Figure 8. Changes in the relative gene abundances in Barrow metagenomes based on FOAM module classifications. Error bars represent the standard error.

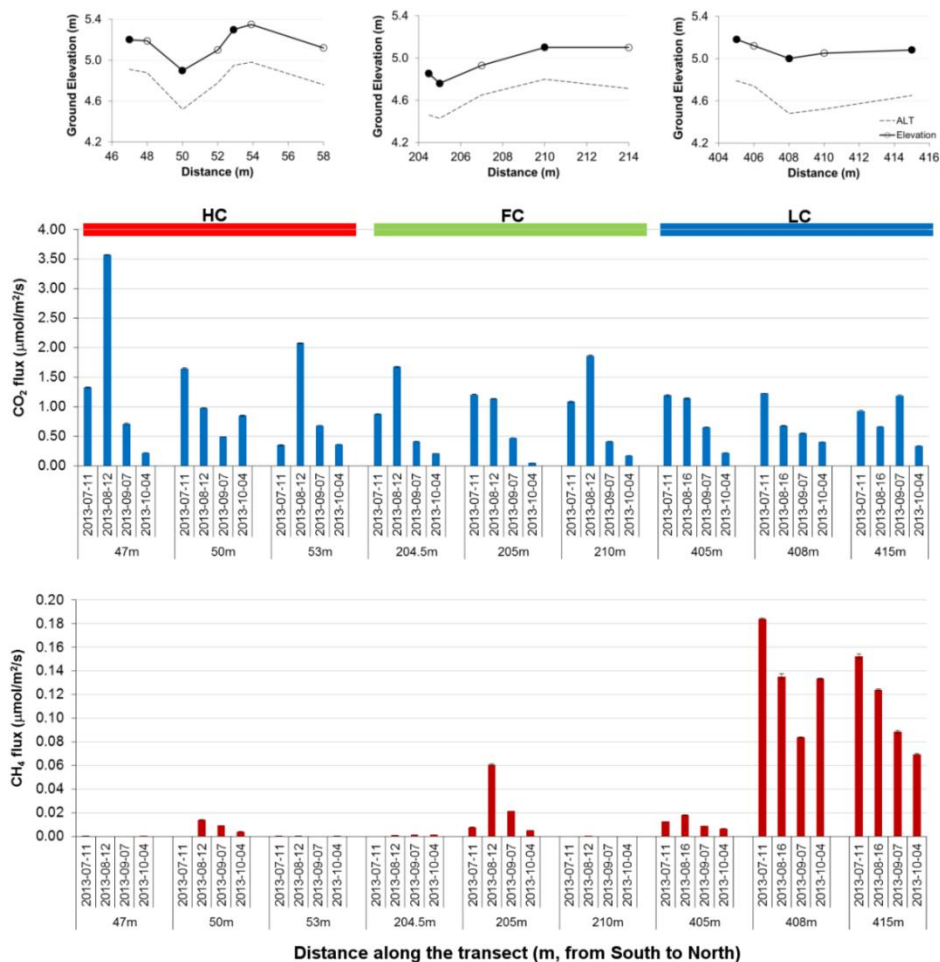

Supplementary Figure 9. CO<sub>2</sub> and CH<sub>4</sub> fluxes measurements collected in 2013 from high-centered (HC, red bar), flat-centered (FC, green bar) and low-centered (LC, blue bar) polygons across the transect<sup>9</sup>. Circles show sampling locations for metagenomes. Closed circles (●) shows the sampling points in each polygon (n=3 per polygon) for CO<sub>2</sub> and CH<sub>4</sub> fluxes measurements. When present, error bars show the standard error for fluxes from 3-4 replicate chambers within the same polygon feature. Details for 2013 measurements are provided in Materials and Methods. LC polygons were consistent sources of CH<sub>4</sub> throughout snow-free season. In HC and FC polygons, however, only wet areas such as troughs had detectable CH<sub>4</sub> fluxes, which were 12-40 times less (F=21.09, p=4.549e-07) than those from LC polygons.

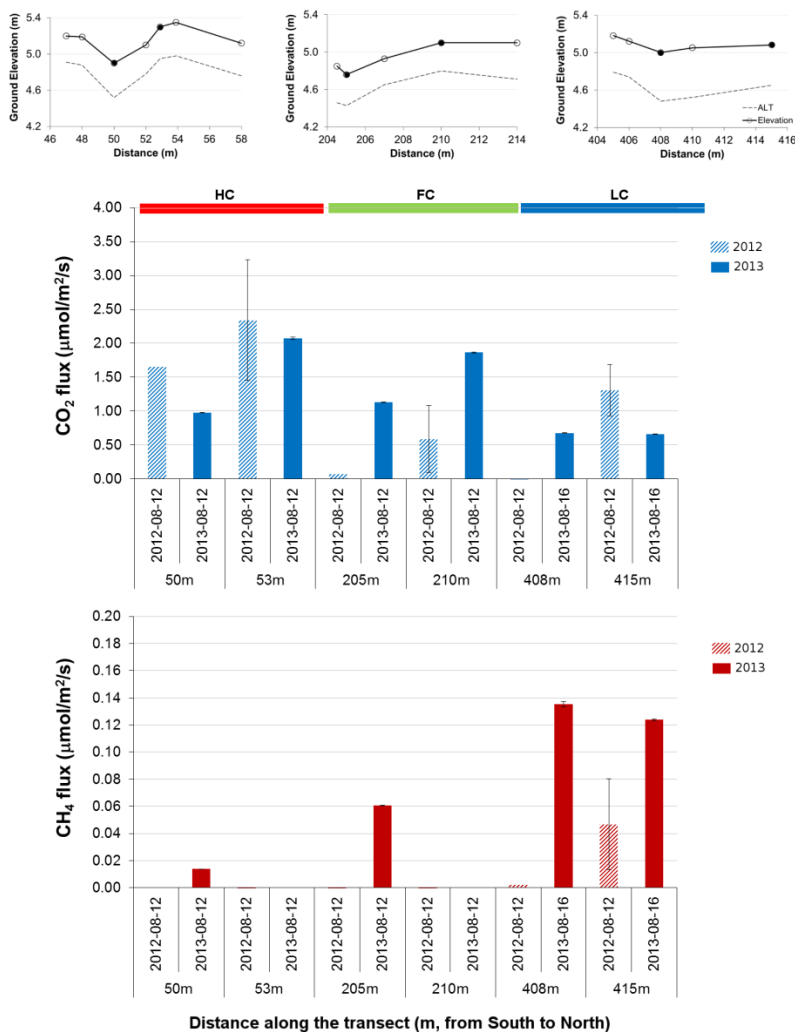

Supplementary Figure 10. Comparison between CO<sub>2</sub> and CH<sub>4</sub> flux measurements collected in August 2012 and 2013 from high-centered (HC, red bar), flat-centered (FC, green bar) and low-centered (LC, blue bar) polygons across the transect<sup>9</sup>. Closed circles (●) shows the sampling points in each polygon (n=2 per polygon) for CO<sub>2</sub> and CH<sub>4</sub> fluxes measurements. In 2012, fluxes were measured from three replicate locations in polygon centers and one location in polygon troughs in HC and FC polygons and a polygon rim in LC polygons. When present, error bars show the standard deviations for the replicate measurement locations in polygon centers. Details for 2013 measurements are provided in Supplementary Figure 9 and Materials and Methods.

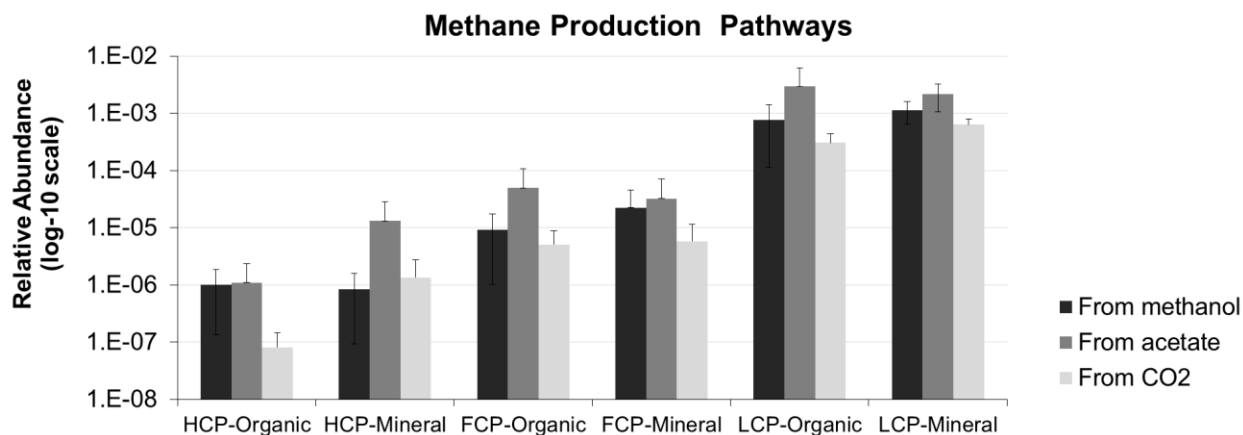

Supplementary Figure 11. Changes in the relative gene abundances of methane production pathways in Barrow metagenomes calculated from detected functional genes. Methanol pathway includes: *methanol-5-hydroxybenzimidazolylcobamide Co-methyltransferase* [EC:2.1.1.90] (*mtaB*) and *methanol corrinoid protein* (*mtaC*). Acetate pathway includes: *phosphate acetyltransferase* [EC:2.3.1.8] (*pta*), *acetyl-CoA synthetase* [EC:6.2.1.1] (*ACSS*), *acetyl-CoA decarboxylase/synthase complex subunit delta* [EC:2.1.1.245] (*cdhD*), *acetyl-CoA decarboxylase/synthase complex subunit epsilon* (*cdhB*), *tetrahydromethanopterin S-methyltransferase* [EC:2.1.1.86] subunit A,B,C,D,E, F (*mtrA*, *mtrB*, *mtrC*, *mtrD*, *mtrE*, *mtrF*). CO<sub>2</sub> pathway includes: *4Fe-4S ferredoxin* (*fwdF*), *formylmethanofuran dehydrogenase* [EC:1.2.99.5] subunit A, B,C,D (*fwdA*, *fwdB*, *fwdC*, *fwdD*), *4Fe-4S ferredoxin* (*fwdG*), *4Fe-4S ferredoxin* (*fwdH*), *methylenetetrahydromethanopterin dehydrogenase* [EC:1.5.98.1] (*mtd*). Error bars represent the standard error.

### Taxonomic Classification of Methane Oxidation Genes

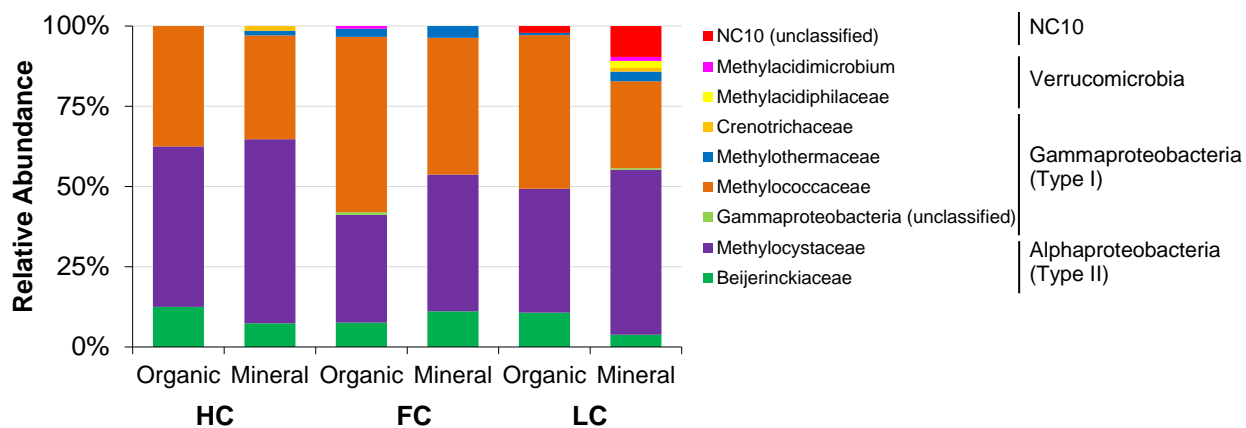

Supplementary Figure 12. Taxonomic distribution (rank order: Family) of particulate methane monooxygenase (pmoABC) and soluble methane monooxygenase (mmoXYZ) genes in Barrow metagenomes.

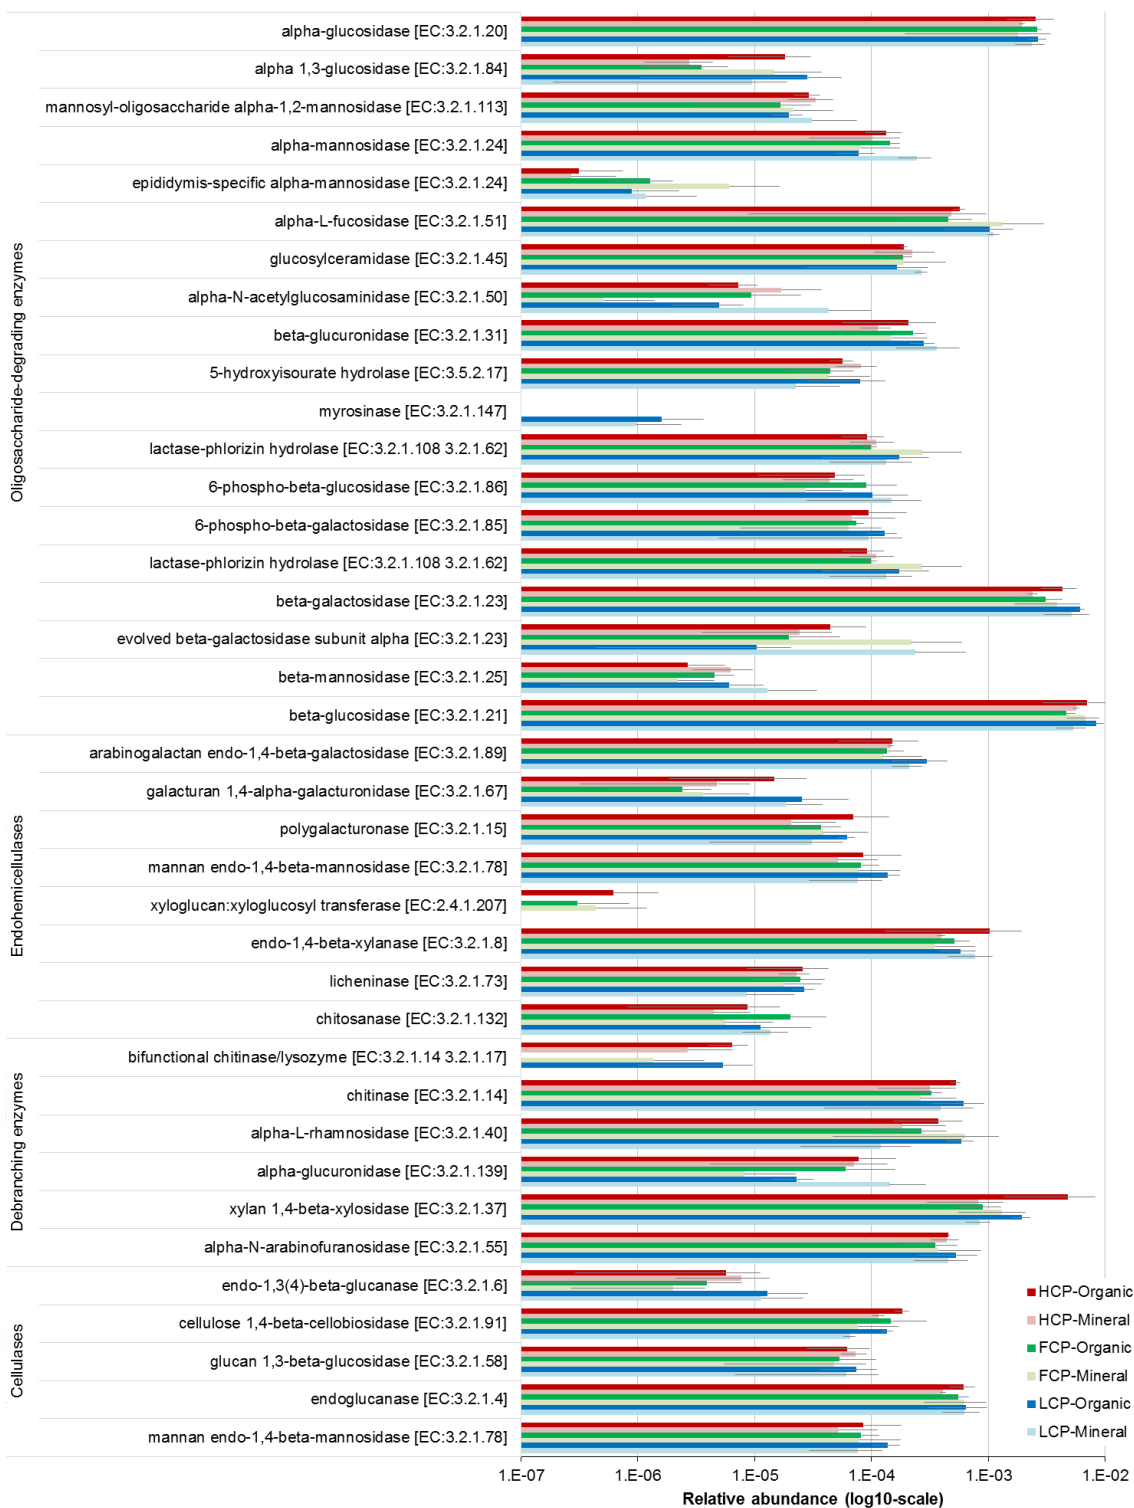

Supplementary Figure 13. Relative distribution of carbohydrate-active enzymes (CAZymes) in Barrow metagenomes. Error bars represent the standard error.

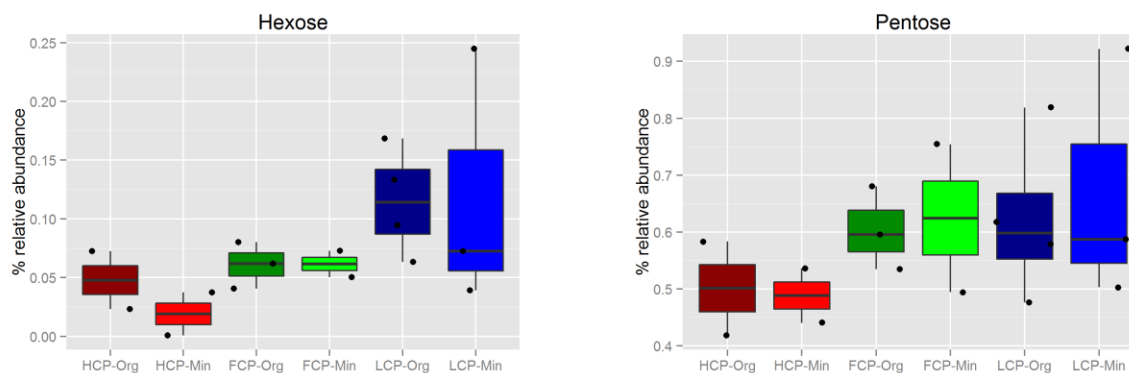

Supplementary Figure 14. Relative distribution of genes involved in sugar utilization in Barrow metagenomes were marginally but significantly different for Hexose degradation ( $F=4.18$ ,  $p=0.038$ ) but not for Pentose degradation. Error bars represent the standard error.

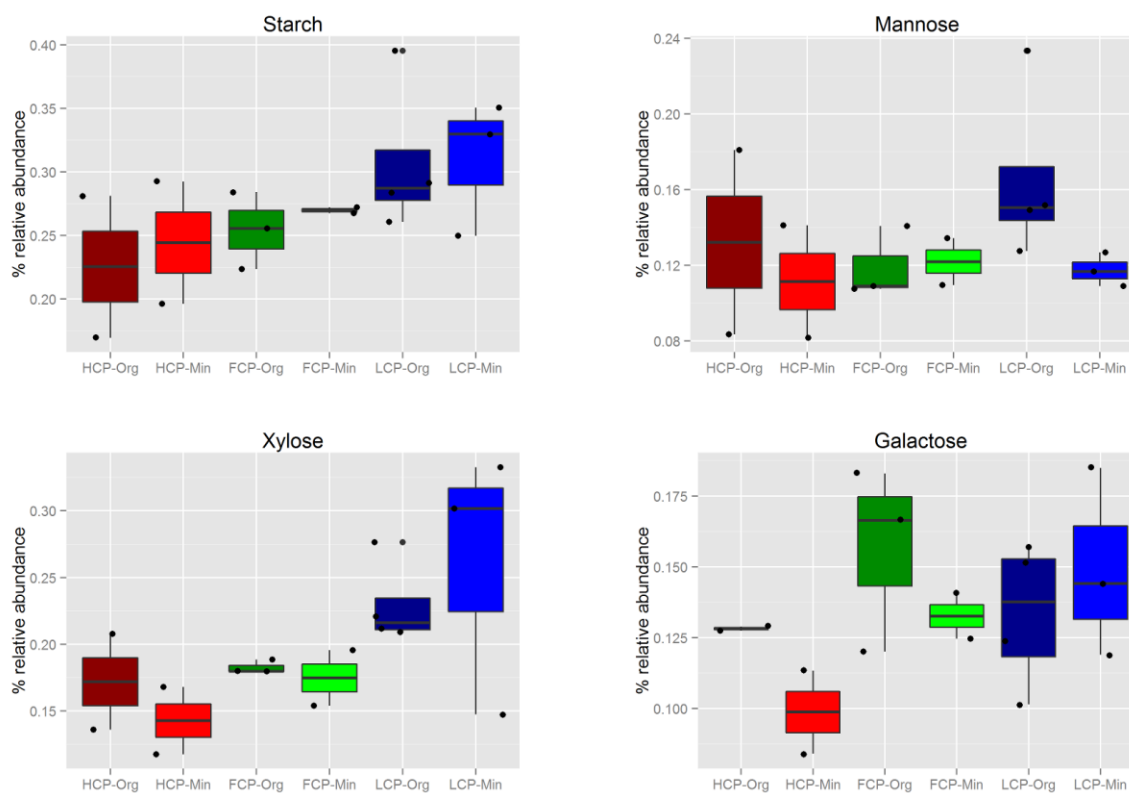

Supplementary Figure 15. Relative distribution of genes involved in polymer hydrolysis in Barrow metagenomes. LC polygons contained higher Xylose degradation genes than HC and FC polygons ( $\rho=0.61$ ,  $p=0.006$ ). Error bars represent the standard error.



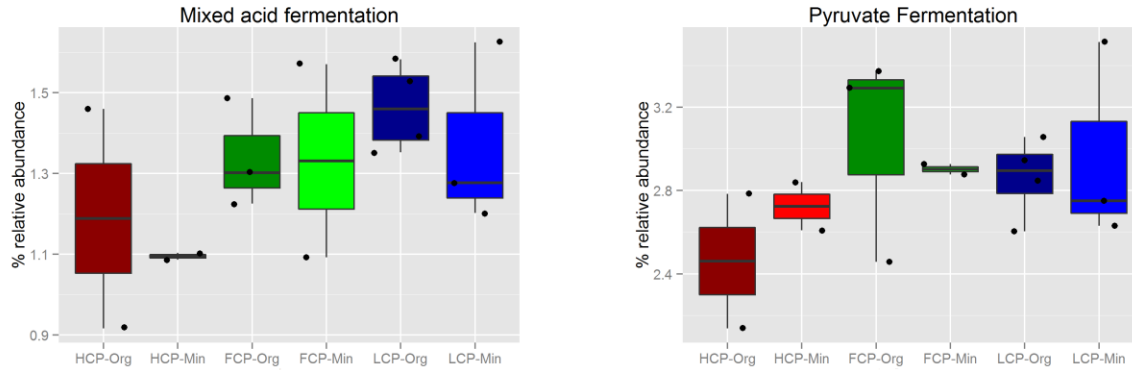

Supplementary Figure 16. Relative distribution of genes involved in fermentation in Barrow metagenomes. Mixed acid fermentation genes were found in higher abundance in LC polygons ( $\rho=0.44$ ,  $p=0.041$ ) than in HC polygons. Error bars represent the standard error.

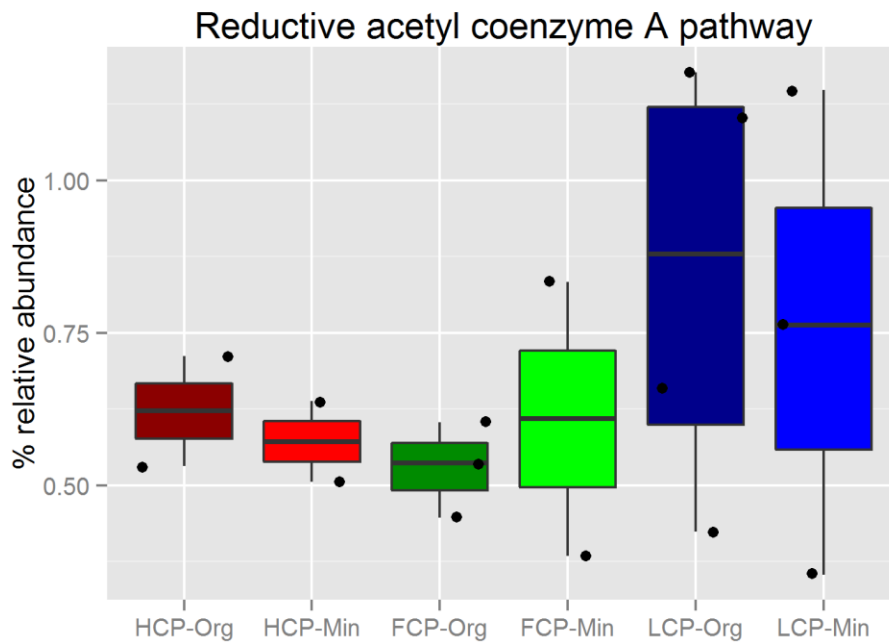

Supplementary Figure 17. Relative distribution of genes involved in homoacetogenesis in Barrow metagenomes. Error bars represent the standard error.

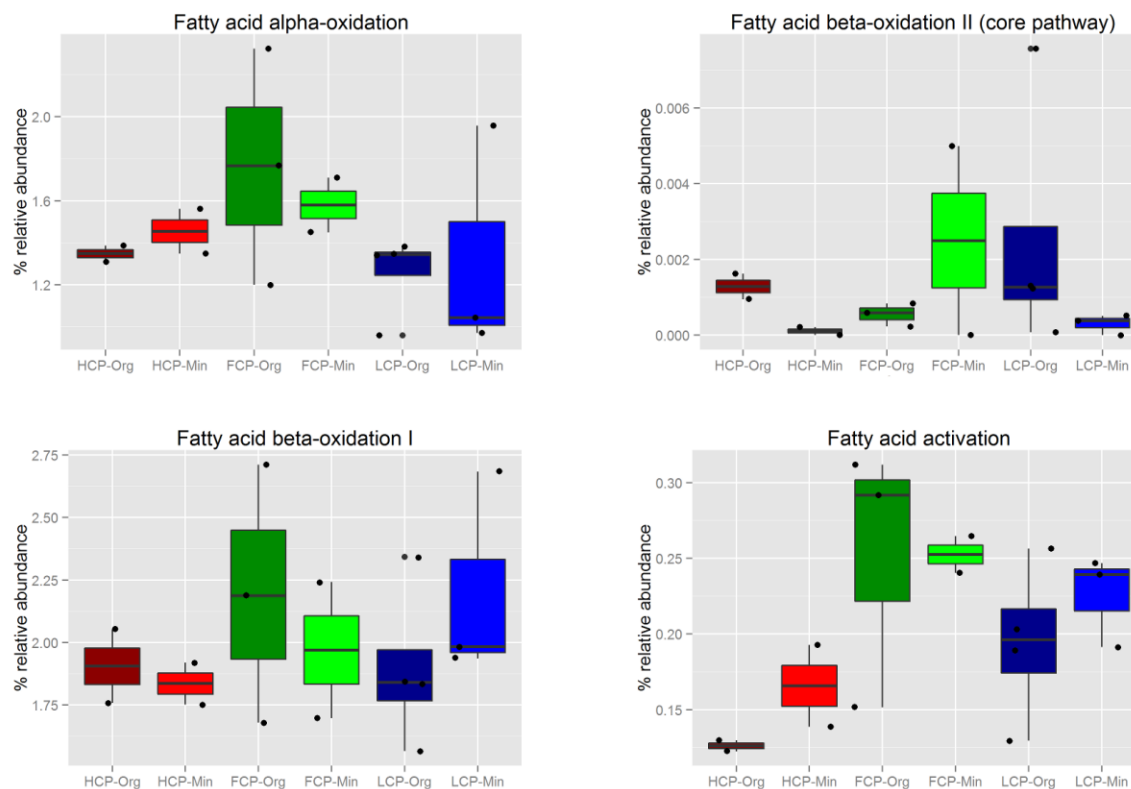

Supplementary Figure 18. Relative distribution of genes involved in fatty acid oxidation in Barrow metagenomes. Error bars represent the standard error.

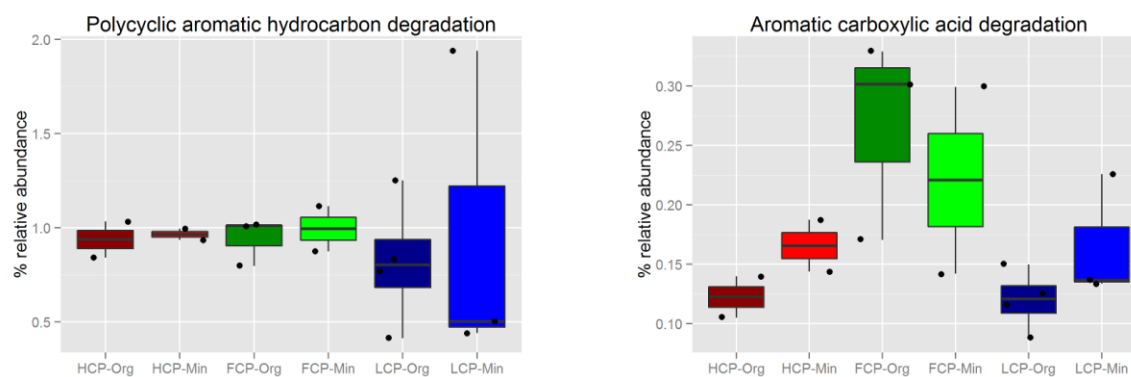

Supplementary Figure 19. Relative distribution of genes involved in hydrocarbon degradation in Barrow metagenomes. Error bars represent the standard error.

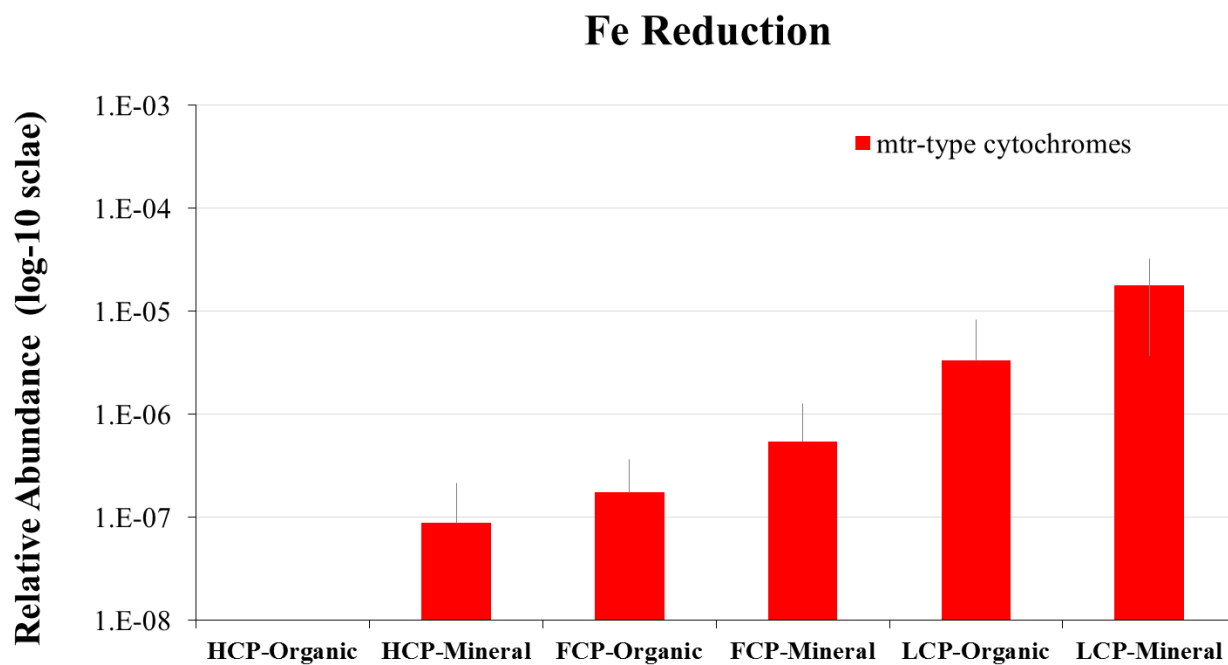

Supplementary Figure 20. Changes in the relative gene abundances of mtr-type decaheme cytochromes in Barrow metagenomes were indicative of Fe-reduction potential in LC polygons. Error bars represent the standard error.

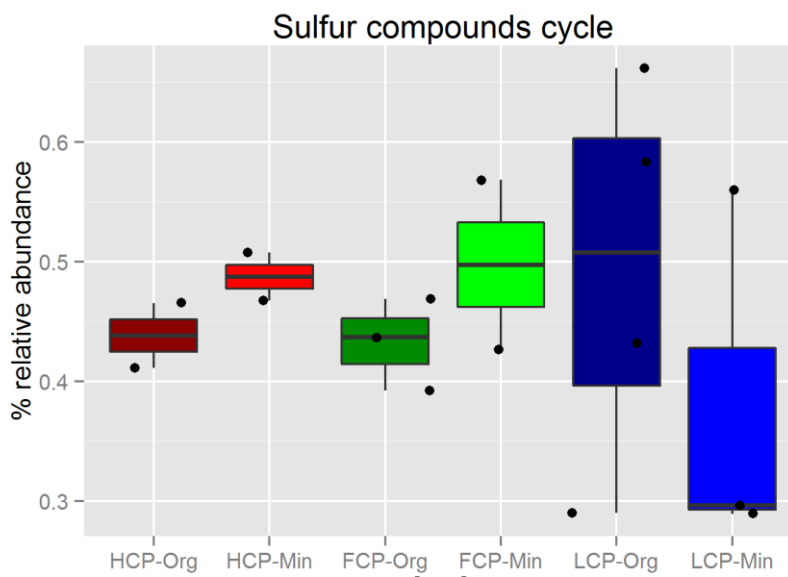

Supplementary Figure 21. Relative distribution of sulfur cycle genes in Barrow metagenomes.

Error bars represent the standard error.

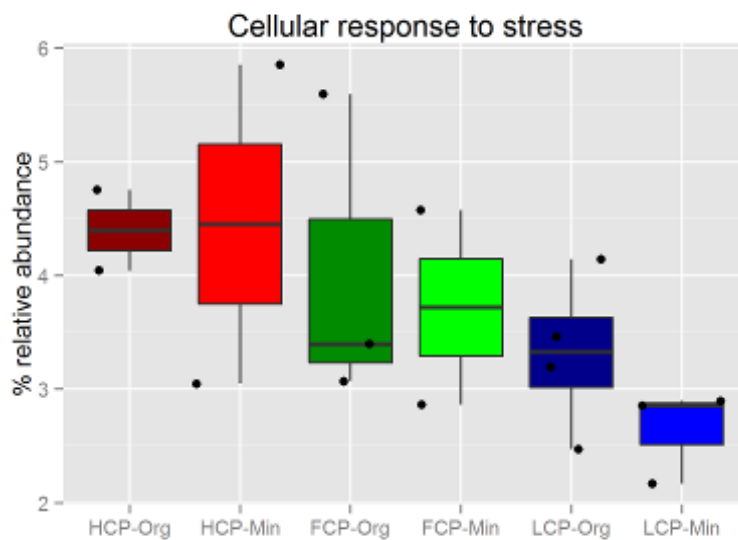

Supplementary Figure 22. Stress response genes were significantly higher in HC polygons in comparison with LC polygons. Error bars represent the standard error.

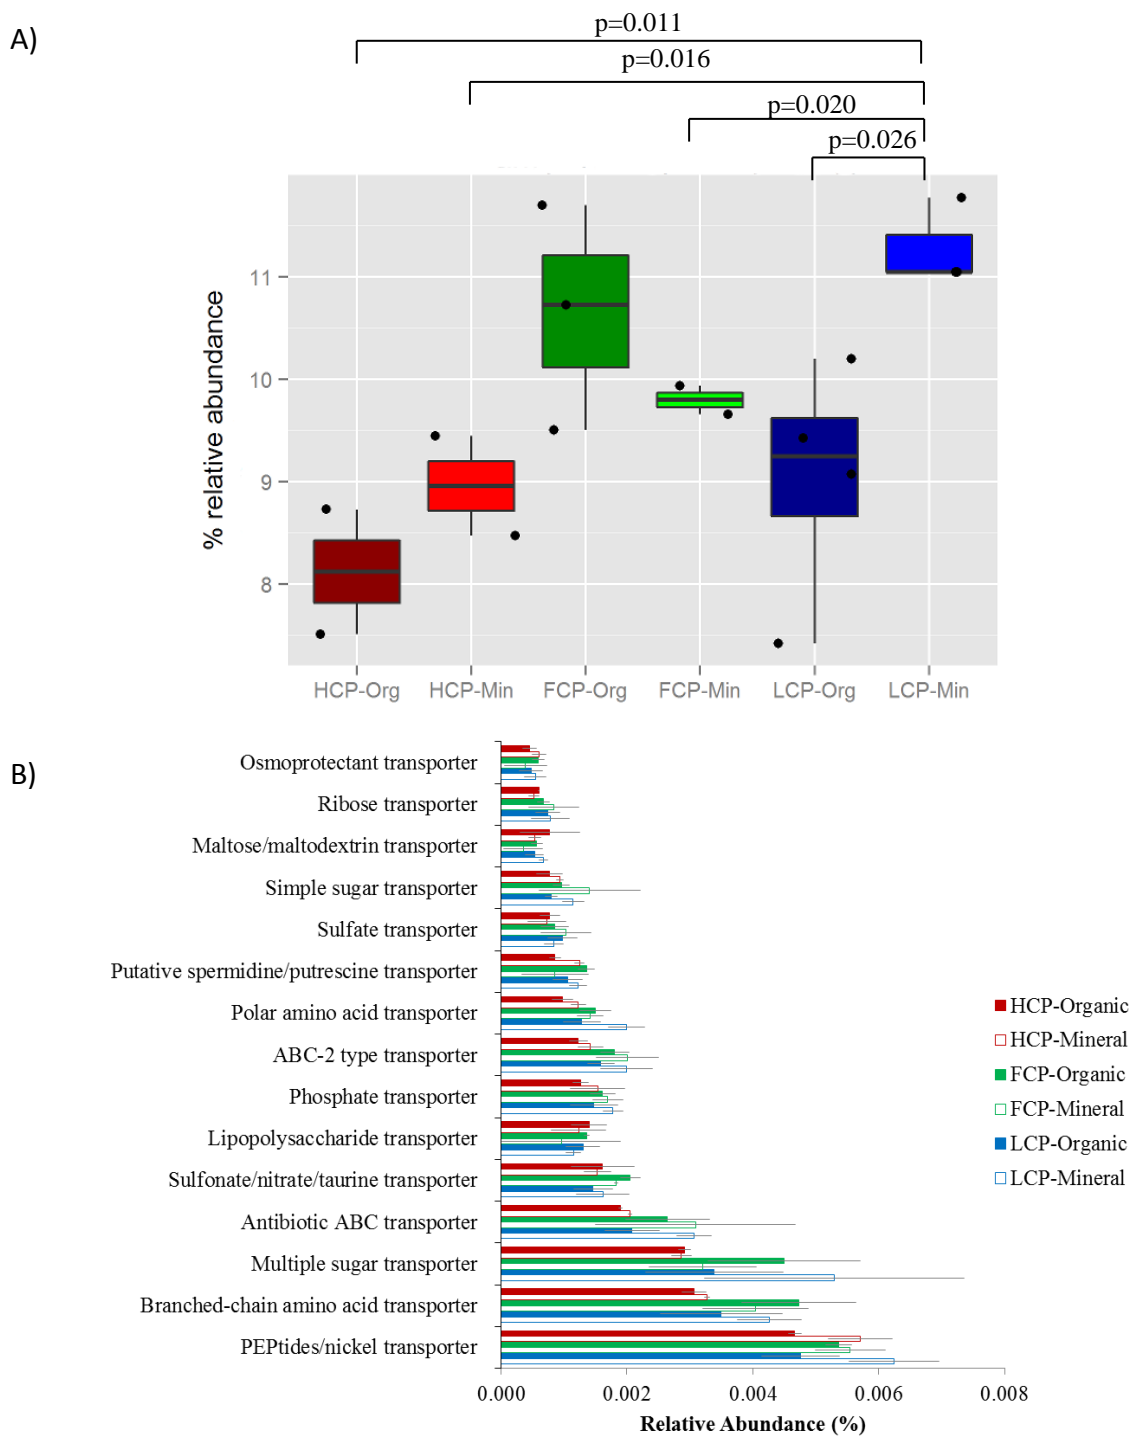

Supplement: 41467_2018_3089_MOESM1_ESM.pdf [file 41467_2018_3089_MOESM1_ESM.pdf]
